# Supplementary material for: Ultrafast structural dynamics of photoexcited adenine
Source: Royal Society of Chemistry journal article supplement (doi:10.1039/c7cp03092d), 2017-01-01
Supplement: c7cp03092d1.pdf [file c7cp03092d1.pdf]

## Electronic Supplementary Information

# Ultrafast Structural Dynamics of Photoexcited Adenine

Sayan Mondal and Mrinalini Puranik\*

Indian Institute of Science Education and Research,  
Pune – 411008, India

\*Corresponding Author

Address: Indian Institute of Science Education and Research

Mendeleev, Dr. Homi Bhabha Road, Pune-411008, India

E-mail: [puranik.mrinalini@gmail.com](mailto:puranik.mrinalini@gmail.com)

Current address: Unilever Research and Development Centre, 64 Whitefield, Bangalore 560066,  
India

## Figures

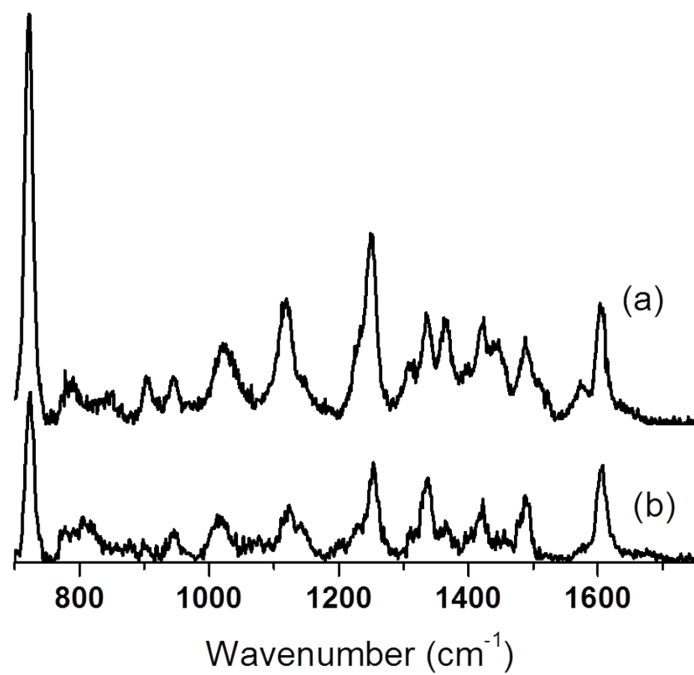

**Figure S1.** (a) Parallel polarized and (b) depolarized RR spectra of aqueous adenine with 215 nm laser excitation. Incident laser power on sample was 0.6 mw and sample concentration was 2 mM in miliQ water.

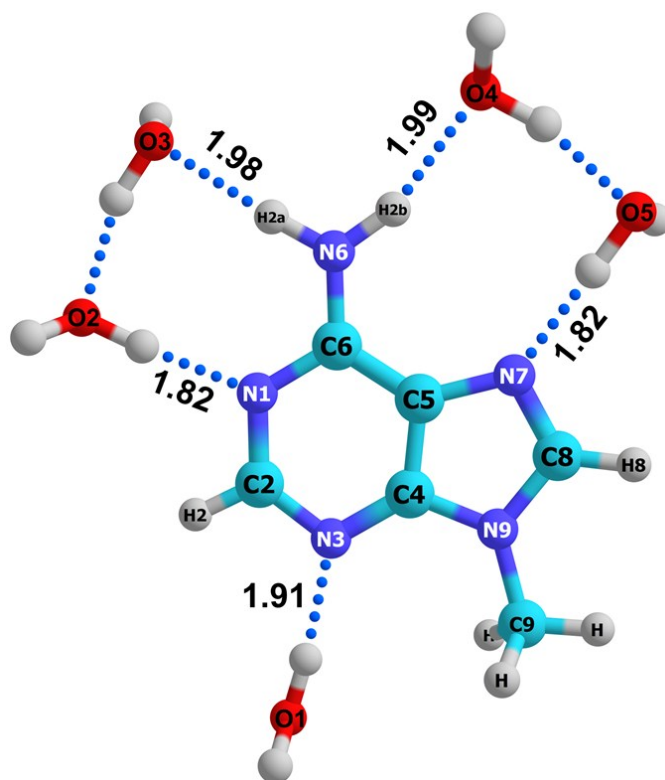

**Figure S2.** Optimized structure of neutral 9-meA in solution as 9-meA•5H<sub>2</sub>O complex at B3LYP/6-311+G(2d,p)//PCM level of theory used for computation of excited states. All H bond distances (in Å) between water molecules and base along with conventional numbering of ring atoms are mentioned.

## Tables

**Table S1.** XYZ Coordinates (Å) of energy optimized ground state structure of Ade•6H<sub>2</sub>O complex<sup>a</sup>.

|   | X            | Y            | Z            |
|---|--------------|--------------|--------------|
| N | -0.639046000 | -1.670515000 | -0.028895000 |
| C | 0.643912000  | -2.044287000 | -0.038467000 |
| N | 1.720960000  | -1.267509000 | -0.027117000 |
| C | 1.404043000  | 0.039761000  | -0.006069000 |
| C | 0.115325000  | 0.569346000  | 0.001485000  |
| C | -0.960949000 | -0.350377000 | -0.008857000 |
| N | 2.252202000  | 1.112815000  | 0.008926000  |
| C | 1.467365000  | 2.225899000  | 0.023605000  |
| N | 0.180502000  | 1.953702000  | 0.019247000  |
| H | 1.888174000  | 3.219130000  | 0.036620000  |
| H | 3.283446000  | 1.075320000  | 0.012256000  |
| O | -4.487561000 | -1.998646000 | 0.011294000  |
| H | -5.017496000 | -2.047503000 | -0.792780000 |
| H | -3.892883000 | -2.781623000 | -0.011981000 |
| O | 4.433529000  | -1.994984000 | -0.106901000 |
| H | 3.455115000  | -1.846561000 | -0.049710000 |
| H | 4.664097000  | -2.544370000 | 0.651641000  |
| O | -1.516480000 | 4.184113000  | -0.011133000 |
| H | -0.909061000 | 3.401079000  | -0.030373000 |
| H | -1.360799000 | 4.660795000  | -0.835009000 |
| O | 5.052399000  | 0.678353000  | -0.041101000 |
| H | 5.561808000  | 0.941270000  | 0.734648000  |
| H | 4.996826000  | -0.305518000 | -0.009236000 |
| N | -2.248265000 | 0.000281000  | -0.000447000 |
| H | -2.977289000 | -0.711913000 | -0.018078000 |
| H | -2.553445000 | 0.970446000  | 0.029622000  |
| H | 0.822323000  | -3.114267000 | -0.057106000 |
| O | -2.440652000 | -3.824415000 | -0.014541000 |
| H | -2.303579000 | -4.331115000 | 0.794588000  |
| H | -1.778292000 | -3.085129000 | 0.009512000  |
| O | -3.728827000 | 2.577174000  | 0.039222000  |
| H | -4.226702000 | 2.709583000  | 0.854177000  |
| H | -3.034166000 | 3.274145000  | 0.034310000  |

<sup>a</sup>computed at B3LYP/6-311+G(2d,p)//PCM level

**Table S2.** Experimental and computed vibrational wavenumbers, PED, normal mode description, dimensionless displacements and internal reorganization energies for all RR modes of adenine.

| Exp. wavenum. (cm <sup>-1</sup> ) | Comp <sup>a</sup> wavenum. (cm <sup>-1</sup> ) | PED <sup>b</sup> (%)                                                | Mode description           | $ \Delta ^c$ | $\lambda_{\text{int}}^d$ (cm <sup>-1</sup> ) |
|-----------------------------------|------------------------------------------------|---------------------------------------------------------------------|----------------------------|--------------|----------------------------------------------|
| 1602                              | 1624                                           | str N3C4 (12) - be C5N7C8 (11) - H9N9C8 (14) - C4N9C8 (13)          | Pyr str                    | 0.32         | 81.3                                         |
| 1486                              | 1527                                           | - str N7C8 (14) + N6C6 (24) + be C8H (13)                           | Pyr breath + Imid str      | 0.221        | 36.4                                         |
| 1440                              | 1499                                           | - str N7C8 (17) - N3C2 (10) + N1C6 (11) - be C2H (10) - C4N9C8 (10) | In-plane purine def        | 0.220        | 34.8                                         |
| 1420                              | 1438                                           | - str N6C6 (11) - N9C4 (26) + be C5N7C8 (22)                        | In-plane purine def        | 0.31         | 68.1                                         |
| 1402                              | 1381                                           | be C2H (20)                                                         | Pyr breath                 | 0.11         | 8.8                                          |
| 1364                              | 1485                                           | - str N9C8 (12) + be H9N9C8 (39) + C2H (21)                         | CH and NH be               | 0.27         | 49.1                                         |
| 1333                              | 1358                                           | str N1C2 (39) + N7C5 (11)                                           | Pyr def                    | 0.30         | 60.9                                         |
| 1309                              | 1337                                           | str N3C2 (37) + N7C5 (13) - be N1C2N3 (15)                          | Pyr def                    | 0.20         | 25.6                                         |
| 1251                              | 1284                                           | str N7C8 (27) + N1C2 (10) + be C8H (29)                             | Imid def                   | 0.37         | 83.7                                         |
| 1231                              | 1243                                           | str N7C5 (32) - be N6C6C5 (10) + C6N6H6a (12)                       | Rock NH <sub>2</sub>       | 0.19         | 21.3                                         |
| 1142                              | 1143                                           | str N9C8 (13) + be C5N7C8 (21) - C8H (24)                           | Pyr breath                 | 0.17         | 16.5                                         |
| 1120                              | 1176                                           | str N9C8 (39) - be N7C8N9 (11)                                      | Imid def                   | 0.51         | 145.9                                        |
| 1021                              | 1029                                           | str N1C6 (32) + rock NH <sub>2</sub> (16)                           | Rock NH <sub>2</sub>       | 0.39         | 76.2                                         |
| 904                               | 923                                            | - be C6N1C2 (10) + N1C2N3 (20) + C4N9C8 (13)                        | In-plane pyr def           | 0.31         | 42.5                                         |
| 725                               | 742                                            | - str N3C4 (12)                                                     | In-phase pyr + imid breath | 0.80         | 230.0                                        |
|                                   |                                                |                                                                     |                            | Total        | 981                                          |

<sup>a</sup> without scaling and computed at B3LYP/6-311+G(2d,p) level on N9H-Ade•6H<sub>2</sub>O complex with PCM solvation; <sup>b</sup>Potential energy distributions (PEDs) of each normal mode computed using VEDA 4.0 program, sign indicates relative phase of movement of internal coordinates; <sup>c</sup>best-fitted dimensionless  $\Delta$ 's for all RR active modes of adenine with parameters described in Table 2; <sup>d</sup>mode specific internal reorganization energies calculated using the relation,  $\lambda_k = (\Delta_k^2 \omega_k) / 2$ ; Abbreviations, str, bond stretching; be, angle bending; out, out of plane motion; tors, torsional vibration and rock, rocking motion of exocyclic amino group; def, in-plane ring deformation; breath, ring breathing; rock, rocking motion; Pyr, pyrimidine ring; Imid, imidazole ring.

**Table S3.** Depolarization ratios for Raman bands of adenine obtained at excitation wavelength of 215 nm.

| RR Band<br>( $\text{cm}^{-1}$ ) | Depolarization<br>ratio ( $\rho$ ) |
|---------------------------------|------------------------------------|
| 725                             | 0.33                               |
| 1021                            | 0.34                               |
| 1120                            | 0.28                               |
| 1142                            | 0.38                               |
| 1231                            | 0.33                               |
| 1251                            | 0.37                               |
| 1309                            | 0.31                               |
| 1333                            | 0.49                               |
| 1364                            | 0.18                               |
| 1402                            | 0.33                               |
| 1420                            | 0.31                               |
| 1486                            | 0.60                               |
| 1602                            | 0.51                               |

**Table S4.** XYZ Coordinates (Å) of energy optimized ground state structure of 9-meA•5H<sub>2</sub>O complex<sup>a</sup>.

|   | X            | Y            | Z            |
|---|--------------|--------------|--------------|
| N | -0.297237000 | -1.678546000 | -0.028057000 |
| C | 1.017778000  | -1.916379000 | -0.033895000 |
| N | 2.010277000  | -1.032835000 | -0.019907000 |
| C | 1.557242000  | 0.231460000  | -0.001269000 |
| C | 0.221103000  | 0.626280000  | 0.003181000  |
| C | -0.754734000 | -0.399443000 | -0.007994000 |
| N | 2.295054000  | 1.387902000  | 0.014014000  |
| C | 1.391994000  | 2.412204000  | 0.025601000  |
| N | 0.141651000  | 2.008117000  | 0.019105000  |
| H | 1.710470000  | 3.443287000  | 0.037533000  |
| O | -4.086714000 | -2.405311000 | 0.012249000  |
| H | -4.615343000 | -2.502440000 | -0.788278000 |
| H | -3.414365000 | -3.122320000 | -0.022060000 |
| O | 4.634442000  | -2.219435000 | -0.090229000 |
| H | 3.762502000  | -1.769361000 | -0.038669000 |
| H | 4.909785000  | -2.339418000 | 0.825531000  |
| O | -1.778346000 | 4.057646000  | -0.034344000 |
| H | -1.094161000 | 3.341764000  | -0.046860000 |
| H | -1.680875000 | 4.532127000  | -0.868388000 |
| N | -2.071295000 | -0.183694000 | -0.000767000 |
| H | -2.722508000 | -0.967880000 | -0.015980000 |
| H | -2.475492000 | 0.749395000  | 0.036502000  |
| H | 1.305373000  | -2.962441000 | -0.051330000 |
| O | -1.863913000 | -4.009425000 | -0.044403000 |
| H | -1.671030000 | -4.512285000 | 0.755704000  |
| H | -1.282154000 | -3.205633000 | -0.009704000 |
| O | -3.807268000 | 2.225476000  | 0.065999000  |
| H | -4.301717000 | 2.310282000  | 0.889373000  |
| H | -3.191787000 | 2.992780000  | 0.043861000  |
| C | 3.748583000  | 1.498618000  | 0.018956000  |
| H | 4.156946000  | 1.024316000  | 0.910247000  |
| H | 4.162392000  | 1.020695000  | -0.867659000 |
| H | 4.015414000  | 2.552482000  | 0.017802000  |

<sup>a</sup>computed at B3LYP/6-311+G(2d,p)//PCM level.

**Table S5.** Experimental and computed wavenumbers and PEDs of vibrational modes of 9-meA.

| RR,<br>Solution,<br>257 nm <sup>1</sup> | Raman,<br>Solid,<br>514.5 nm <sup>2</sup> | IR, in Ar<br>matrix <sup>3</sup> | SERS <sup>4</sup> | Comp.<br>Freq <sup>5</sup> | IR-UV<br>ion-dip,<br>Freq <sup>6</sup> | Comp.<br>Freq,<br>(Scaled<br>by<br>0.983) <sup>6</sup> | Comp.<br>Freq,<br>9-meA <sup>a</sup> | Comp.<br>Freq,<br>9-meA +<br>5H <sub>2</sub> O <sup>b</sup> | PED (%) <sup>c</sup>                                                                                                                                                                                                                                              | Assignment                                                                                                                              |
|-----------------------------------------|-------------------------------------------|----------------------------------|-------------------|----------------------------|----------------------------------------|--------------------------------------------------------|--------------------------------------|-------------------------------------------------------------|-------------------------------------------------------------------------------------------------------------------------------------------------------------------------------------------------------------------------------------------------------------------|-----------------------------------------------------------------------------------------------------------------------------------------|
| cm <sup>-1</sup>                        | cm <sup>-1</sup>                          | cm <sup>-1</sup>                 | cm <sup>-1</sup>  | cm <sup>-1</sup>           | cm <sup>-1</sup>                       | cm <sup>-1</sup>                                       | cm <sup>-1</sup>                     | cm <sup>-1</sup>                                            |                                                                                                                                                                                                                                                                   |                                                                                                                                         |
| 1680                                    | 1680                                      | 1632                             |                   | 1630                       | 1632                                   | 1627                                                   | 1636                                 | 1694                                                        | be H <sub>6b</sub> N <sub>6</sub> H <sub>6a</sub> (80)                                                                                                                                                                                                            | $\delta_{\text{Sciss}}$ NH <sub>2</sub>                                                                                                 |
| 1603                                    | 1573                                      | 1596                             | 1597              | 1592                       | 1599                                   | 1593                                                   | 1596                                 | 1595                                                        | str N <sub>3</sub> C <sub>4</sub> (24) - N <sub>9</sub> C <sub>4</sub> (10)                                                                                                                                                                                       | $\nu$ (N <sub>3</sub> -C <sub>4</sub> ) + $\nu$ (N <sub>7</sub> -C <sub>8</sub> ) +<br>$\delta_{\text{Rock}}$ NH <sub>2</sub>           |
| 1537                                    | 1526                                      |                                  | 1568              | 1575                       |                                        | 1579                                                   | 1610                                 | 1622                                                        | - str N <sub>3</sub> C <sub>2</sub> (17) - be C <sub>6</sub> N <sub>1</sub> C <sub>2</sub> (15) +<br>C <sub>4</sub> N <sub>9</sub> C <sub>8</sub> (11) - N <sub>3</sub> C <sub>4</sub> C <sub>5</sub> (10) +<br>C <sub>5</sub> N <sub>7</sub> C <sub>8</sub> (10) |                                                                                                                                         |
|                                         |                                           | 1511                             | 1524              | 1513                       | 1515                                   | 1507                                                   | 1533                                 | 1547                                                        | str N <sub>7</sub> C <sub>8</sub> (10) - N <sub>6</sub> C <sub>6</sub> (13) + be<br>C <sub>4</sub> N <sub>9</sub> C <sub>8</sub> (13) - H <sub>8</sub> C <sub>8</sub> N <sub>7</sub> (13)                                                                         | $\nu$ (N <sub>7</sub> -C <sub>8</sub> ) + $\nu$ (N <sub>9</sub> -C <sub>9</sub> )                                                       |
| 1498                                    | 1517                                      | 1483                             |                   | 1494                       |                                        | 1489                                                   | 1506                                 | 1506                                                        | be HC <sub>me</sub> H (23)                                                                                                                                                                                                                                        | $\delta$ C <sub>2</sub> H + CH <sub>3</sub> def + Pyr def                                                                               |
|                                         |                                           | 1449                             |                   | 1486                       | 1450                                   | 1456                                                   | 1475                                 | 1478                                                        | - be HC <sub>me</sub> H (38) + HC <sub>me</sub> H (39) +<br>tor HC <sub>me</sub> N <sub>9</sub> C <sub>8</sub> (15)                                                                                                                                               | CH <sub>3</sub> def                                                                                                                     |
|                                         |                                           | 1476                             | 1460              |                            | 1470                                   | 1473                                                   | 1492                                 | 1505                                                        | be H <sub>2</sub> C <sub>2</sub> N <sub>1</sub> (18) + HC <sub>me</sub> H (34)                                                                                                                                                                                    | $\delta$ C <sub>2</sub> H + CH <sub>3</sub> def + $\nu$ (C <sub>6</sub> -<br>N <sub>1</sub> ) + $\nu$ (C <sub>2</sub> -N <sub>3</sub> ) |
| 1437                                    |                                           | 1435                             |                   | 1437                       | 1429                                   | 1439                                                   | 1458                                 | 1460                                                        | - be HC <sub>me</sub> H (38) + HC <sub>me</sub> H (39) +<br>tor HC <sub>me</sub> N <sub>9</sub> C <sub>8</sub> (15)                                                                                                                                               | CH <sub>3</sub> def + $\nu$ (N <sub>7</sub> -C <sub>8</sub> )                                                                           |
|                                         |                                           | 1411                             | 1406              |                            | 1414                                   | 1415                                                   | 1429                                 | 1441                                                        | str N <sub>6</sub> C <sub>6</sub> (10) - N <sub>9</sub> C <sub>4</sub> (18) - be C <sub>2</sub> H <sub>2</sub><br>(12) + C <sub>5</sub> N <sub>7</sub> C <sub>8</sub> (16)                                                                                        |                                                                                                                                         |
|                                         |                                           | 1370                             |                   |                            | 1369                                   | 1369                                                   | 1390                                 | 1398                                                        | - str N <sub>9</sub> C <sub>4</sub> (11) + be C <sub>2</sub> H <sub>2</sub> (28)                                                                                                                                                                                  |                                                                                                                                         |
| 1343                                    |                                           | 1328                             | 1329              | 1338                       | 1327                                   | 1336                                                   | 1351                                 | 1360                                                        | str N <sub>1</sub> C <sub>2</sub> (30) + N <sub>7</sub> C <sub>5</sub> (11) - be<br>C <sub>5</sub> N <sub>7</sub> C <sub>8</sub> (11)                                                                                                                             |                                                                                                                                         |
|                                         |                                           | 1344                             |                   |                            | 1345                                   | 1341                                                   | 1361                                 | 1377                                                        | str N <sub>9</sub> C <sub>8</sub> (28)                                                                                                                                                                                                                            | Ring Def + $\nu$ (C <sub>8</sub> -N <sub>9</sub> )                                                                                      |
|                                         |                                           | 1295                             |                   |                            | 1292                                   | 1307                                                   | 1323                                 | 1335                                                        | str N <sub>3</sub> C <sub>2</sub> (31) - N <sub>3</sub> C <sub>4</sub> (10) + N <sub>7</sub> C <sub>5</sub><br>(13)                                                                                                                                               |                                                                                                                                         |
| 1254                                    | 1256                                      | 1254                             | 1242              | 1257                       | 1256                                   | 1254                                                   | 1274                                 | 1280                                                        | str N <sub>1</sub> C <sub>2</sub> (10) - N <sub>7</sub> C <sub>5</sub> (11) + be<br>H <sub>8</sub> C <sub>8</sub> N <sub>7</sub> (31)                                                                                                                             |                                                                                                                                         |
| 1208                                    | 1230                                      | 1234                             |                   | 1230                       | 1232                                   | 1241                                                   | 1262                                 | 1264                                                        | str N <sub>7</sub> C <sub>8</sub> (12)                                                                                                                                                                                                                            |                                                                                                                                         |
|                                         |                                           |                                  |                   |                            | 1199                                   | 1199                                                   | 1216                                 | 1218                                                        | str N <sub>7</sub> C <sub>5</sub> (22) + be H <sub>8</sub> C <sub>8</sub> N <sub>7</sub> (14)                                                                                                                                                                     |                                                                                                                                         |
|                                         |                                           |                                  | 1113              |                            | 1136                                   | 1131                                                   | 1151                                 | 1153                                                        | be HC <sub>me</sub> H (17) - HC <sub>me</sub> H (17) - tor                                                                                                                                                                                                        | CH <sub>3</sub> def                                                                                                                     |



|      |      |      |      |      |      |      |      |      |                                                                                                                                                                                                                                                                                                                                                                                                                              |                                                                                                         |
|------|------|------|------|------|------|------|------|------|------------------------------------------------------------------------------------------------------------------------------------------------------------------------------------------------------------------------------------------------------------------------------------------------------------------------------------------------------------------------------------------------------------------------------|---------------------------------------------------------------------------------------------------------|
|      |      |      |      |      |      |      |      |      | HC <sub>me</sub> N <sub>9</sub> C <sub>8</sub> (54)                                                                                                                                                                                                                                                                                                                                                                          |                                                                                                         |
|      |      |      |      |      | 1067 | 1055 | 1077 | 1092 | str N <sub>9</sub> C <sub>8</sub> (12) + be C <sub>2</sub> N <sub>3</sub> C <sub>4</sub> (12)                                                                                                                                                                                                                                                                                                                                | δ <sub>rock</sub> NH <sub>2</sub> + CH <sub>3</sub> def                                                 |
| 1010 | 1047 | 1044 |      | 1043 | 1036 | 1041 | 1061 | 1073 | be N <sub>9</sub> C <sub>8</sub> N <sub>7</sub> (23) + tor HC <sub>me</sub> N <sub>9</sub> C <sub>8</sub> (13) - HC <sub>me</sub> N <sub>9</sub> C <sub>8</sub> (13)                                                                                                                                                                                                                                                         | δ <sub>rock</sub> NH <sub>2</sub> + Imd def + CH <sub>3</sub> def + v (C <sub>8</sub> -N <sub>9</sub> ) |
|      |      |      | 1015 |      | 1000 | 984  | 1004 | 1017 | str N <sub>1</sub> C <sub>6</sub> (32) + be H <sub>2b</sub> N <sub>2</sub> O <sub>3</sub> (11)                                                                                                                                                                                                                                                                                                                               |                                                                                                         |
|      |      | 944  | 958  |      | 958  | 961  | 975  | 980  | tor H <sub>2</sub> C <sub>2</sub> HN <sub>3</sub> (77) - N <sub>1</sub> C <sub>2</sub> N <sub>3</sub> C <sub>4</sub> (10)                                                                                                                                                                                                                                                                                                    | γ C <sub>2</sub> H                                                                                      |
|      |      | 894  |      |      | 895  | 892  | 908  | 935  | be N <sub>1</sub> C <sub>2</sub> N <sub>3</sub> (22)                                                                                                                                                                                                                                                                                                                                                                         | Ring def                                                                                                |
|      |      | 843  |      |      | 841  | 838  | 873  | 877  | - tor H <sub>8</sub> C <sub>8</sub> HO <sub>5</sub> (71) - C <sub>4</sub> N <sub>9</sub> C <sub>8</sub> N <sub>7</sub> (13)                                                                                                                                                                                                                                                                                                  | γ C <sub>8</sub> H                                                                                      |
|      |      | 800  |      |      | 800  | 796  | 820  | 824  | tor N <sub>1</sub> C <sub>2</sub> N <sub>3</sub> C <sub>4</sub> (17) - C <sub>6</sub> N <sub>1</sub> C <sub>2</sub> N <sub>3</sub> (15) - C <sub>5</sub> N <sub>7</sub> C <sub>8</sub> N <sub>9</sub> (18) - out N <sub>3</sub> N <sub>9</sub> C <sub>5</sub> C <sub>4</sub> (23)                                                                                                                                            | τ <sub>def</sub> (Pyr + Imd)                                                                            |
| 728  |      |      | 735  | 731  | 730  | 734  | 745  | 758  | str N <sub>9</sub> C <sub>8</sub> (13) + N <sub>9</sub> C <sub>me</sub> (19) + be N <sub>9</sub> C <sub>8</sub> N <sub>7</sub> (11)                                                                                                                                                                                                                                                                                          | τ <sub>def</sub> (Pyr + Imd) + v (N <sub>9</sub> -C <sub>9</sub> )                                      |
|      |      |      |      | 714  | 715  | 718  | 726  | 723  | be O1HN3 (12)                                                                                                                                                                                                                                                                                                                                                                                                                |                                                                                                         |
|      |      | 681  |      |      | 673  | 679  | 691  | 700  | - tor H <sub>6a</sub> N <sub>6</sub> C <sub>6</sub> C <sub>5</sub> (12) - H <sub>6b</sub> N <sub>6</sub> H <sub>6a</sub> O <sub>3</sub> (11) - C <sub>2</sub> N <sub>3</sub> C <sub>4</sub> N <sub>9</sub> (10) - N <sub>1</sub> C <sub>2</sub> N <sub>3</sub> C <sub>4</sub> (13) - C <sub>6</sub> N <sub>1</sub> C <sub>2</sub> N <sub>3</sub> (11) + out N <sub>3</sub> N <sub>9</sub> C <sub>5</sub> C <sub>4</sub> (17) | τ Ring                                                                                                  |
| 601  |      | 645  | 620  | 645  | 640  | 650  | 658  | 655  | tor C <sub>5</sub> N <sub>7</sub> C <sub>8</sub> N <sub>9</sub> (46)                                                                                                                                                                                                                                                                                                                                                         | τ Ring                                                                                                  |
|      |      | 581  |      | 588  | 577  | 578  | 590  | 606  | be N <sub>6</sub> C <sub>6</sub> C <sub>5</sub> (13) + H <sub>2b</sub> N <sub>2</sub> O <sub>3</sub> (13)                                                                                                                                                                                                                                                                                                                    | τ NH <sub>2</sub>                                                                                       |
|      |      | 575  |      | 563  | 553  | 558  | 570  | 569  | - tor N <sub>1</sub> C <sub>2</sub> N <sub>3</sub> C <sub>4</sub> (16) + C <sub>6</sub> N <sub>1</sub> C <sub>2</sub> N <sub>3</sub> (19) - C <sub>4</sub> N <sub>9</sub> C <sub>8</sub> N <sub>7</sub> (19) - out N <sub>6</sub> N <sub>1</sub> C <sub>5</sub> C <sub>6</sub> (14)                                                                                                                                          |                                                                                                         |
| 535  | 542  |      | 536  | 552  |      | 532  | 544  | 552  | str N <sub>9</sub> C <sub>4</sub> (11) + N <sub>9</sub> C <sub>me</sub> (14) - be C <sub>4</sub> N <sub>9</sub> C <sub>8</sub> (11) + C <sub>2</sub> N <sub>3</sub> C <sub>4</sub> (21) - C <sub>me</sub> N <sub>9</sub> C <sub>4</sub> (13)                                                                                                                                                                                 | Ring def                                                                                                |
|      |      |      |      | 529  |      | 523  | 531  | 542  | be C <sub>6</sub> N <sub>1</sub> C <sub>2</sub> (16) - C <sub>2</sub> N <sub>3</sub> C <sub>4</sub> (12) + N <sub>1</sub> C <sub>2</sub> N <sub>3</sub> (10)                                                                                                                                                                                                                                                                 |                                                                                                         |

<sup>1</sup> Ref 1, RR with 257 nm excitation of aqueous solution at pH 7; <sup>2</sup> Ref 2, FT-IR, and Raman with 514.5 nm laser on polycrystalline state of 9-meA; <sup>3</sup> Ref 3, FT-IR spectra of 9-meA in Ar gas matrix; <sup>4</sup> Ref 4, Surface enhanced Raman scattering (SERS) of adsorbed 9-meA on Ag electrode with 514.5 nm excitation; <sup>5</sup> Ref 5, computed at B3LY/6-31G(d)//gas level of theory, and using scaled quantum mechanical (SQM) method described there in; <sup>6</sup> Ref 6, computed at B3LY/6-311++G(df, pd)//gas level and scaled by 0.983; <sup>a, b</sup> this work, computed on isolated 9-meA <sup>a</sup>, and 9-meA + 5 H<sub>2</sub>O complex <sup>b</sup> at B3LYP/6-311+G(2d,p)//PCM level and are not scaled; <sup>c</sup> this work, PEDs are computed on energy optimized 9-meA + 5 H<sub>2</sub>O complex using VEDA 4.0 program (Ref 7). Abbreviations: PED =

Potential Energy Distribution;  $\nu$  = bond stretching;  $\delta$ , be = in-plane bending,  $\gamma$ , out = out of plane bending;  $\tau$ , tors = out of plane torsion; sciss = scissoring; rock = rocking motion; Pyr = pyrrole ring; Imd = imidazole ring; def = ring deformation; twist = twisting motion. Negative sign in front of a contribution in PED indicate out of phase vibration with respect to that with positive sign.

**Table S6.** Computed sign of deltas for intense RR bands of Ade with B3LYP and CAM-B3LYP functional on  $B_b$  state.

| Vibrational Frequencies<br>( $\text{cm}^{-1}$ ) |                       | Sign of $\Delta s$ |                        |
|-------------------------------------------------|-----------------------|--------------------|------------------------|
| Experimental                                    | Computed <sup>a</sup> | B3LYP <sup>b</sup> | CAM-B3LYP <sup>c</sup> |
| 725                                             | 742                   | 1                  | 1                      |
| 1021                                            | 1029                  | -1                 | -1                     |
| 1120                                            | 1176                  | -1                 | -1                     |
| 1251                                            | 1284                  | 1                  | 1                      |
| 1333                                            | 1358                  | -1                 | -1                     |
| 1420                                            | 1438                  | 1                  | 1                      |
| 1364                                            | 1485                  | 1                  | 1                      |
| 1486                                            | 1527                  | 1                  | 1                      |
| 1602                                            | 1624                  | 1                  | 1                      |

<sup>a</sup>computed at B3LYP/6-311+G(2d,p)//PCM level and are not scaled; Sign of gradients are obtained with computed cartesian gradients on  $B_b$  electronic state with <sup>b</sup>TD-B3LYP and with <sup>c</sup>TD-CAM-B3LYP method. Gradients with both the methods are calculated on optimized ground state geometry and normal modes of Ade•6H<sub>2</sub>O complex with at B3LYP/6-311+G(2d,p)//PCM method.

## Details of computational methods

Explicit water molecules are included to account for non-covalent interactions that seem important in several studies; decay of photoexcited Ade,<sup>8,9</sup> computation of pKa values,<sup>10</sup> and prediction of vibrational frequencies.<sup>11</sup> Use of such treatment along with continuum type bulk solvation (PCM) is known as cluster-continuum model.<sup>12</sup> B3LYP functional has been extensively used for computation of vibrational frequencies of nucleobase systems.<sup>11,13–17</sup> We obtained good agreement between computed and experimental wavenumbers, and the predicted normal modes are in agreement with the comprehensive vibrational assignment of Ade performed by McNaughton and coworkers.<sup>18</sup> Though the normal modes computed on Ade•6H<sub>2</sub>O complex are similar to those calculated on isolated N<sub>9</sub>H-Ade,<sup>18</sup> subtle differences in the composition of the potential energy distributions (PED) are expected. These differences arise from the directional H-bonding interactions at N1, N3, N7, N9-H sites, and with the -NH<sub>2</sub> moiety with explicit water molecules. Though, these interactions do not drastically change the composition of PEDs, but alters relative contribution from individual internal coordinates.

## 9-meA is a model of N<sub>9</sub>H-Ade

Both, Ade and 9-meA have the same UV absorbing chromophore, differing with respect to the N9 substituent which is a methyl moiety in the latter case in place of a hydrogen atom in the former. Following the 267 nm excitation, non-radiative relaxation of 9-meA and Ade are found to be very similar with sub-ps decay constants<sup>8,19</sup> Due to change in substitution at the N9 site, the positions of fundamental vibrations of Ade differ minutely from those of 9-meA.<sup>1,3,4,20</sup> Methyl group which is heavier than hydrogen atom alters PEDs of normal modes that are primarily localized on the imidazole ring of Ade.

## References

- 1 S. A. Oladepo and G. R. Loppnow, *J. Phys. Chem. B*, 2011, **115**, 6149–6156.
- 2 R. Savoie, D. Poirier, L. Prizant and A. L. Beauchamp, *J. Raman Spectrosc.*, 1981, **11**, 481–486.

- 3 S. G. Stepanian, G. G. Sheina, E. D. Radchenko and Y. P. Blagoi, *J. Mol. Struct.*, 1985, **131**, 333–346.
- 4 K. Itoh, K. Minami, T. Tsujino and M. Kim, *J. Phys. Chem.*, 1991, **95**, 1339–1345.
- 5 Y. Xue, D. Xie and G. Yan, *Int. J. Quantum Chem.*, 2000, **76**, 686–699.
- 6 G. C. P. van Zundert, S. Jaeqx, G. Berden, J. M. Bakker, K. Kleinermanns, J. Oomens and A. M. Rijs, *ChemPhysChem*, 2011, **12**, 1921–1927.
- 7 M. H. Jamróz, *Spectrochim. Acta Part A Mol. Biomol. Spectrosc.*, 2013, **114**, 220–230.
- 8 T. Gustavsson, N. Sarkar, I. Vayá, M. C. Jiménez, D. Markovitsi and R. Improta, *Photochem. Photobiol. Sci.*, 2013, **12**, 1375.
- 9 M. Barbatti, *J. Am. Chem. Soc.*, 2014, **136**, 10246–10249.
- 10 V. Karunakaran, K. Kleinermanns, R. Improta and S. A. Kovalenko, *J. Am. Chem. Soc.*, 2009, **131**, 5839–5850.
- 11 M. Shanmugasundaram and M. Puranik, *Phys. Chem. Chem. Phys.*, 2011, **13**, 3851.
- 12 R. Improta and V. Barone, 2014, pp. 329–357.
- 13 S. Gogia, A. Jain and M. Puranik, *J. Phys. Chem. B*, 2009, **113**, 15101–15118.
- 14 N. Jayanth, S. Ramachandran and M. Puranik, *J. Phys. Chem. A*, 2009, **113**, 1459–1471.
- 15 N. Jayanth and M. Puranik, *J. Phys. Chem. B*, 2011, **115**, 6234–6242.
- 16 E. A. Milán-Garcés, S. Kaptan and M. Puranik, *Biophys. J.*, 2013, **105**, 211–221.
- 17 S. Gogia and M. Puranik, *J. Biomol. Struct. Dyn.*, 2014, **32**, 27–35.
- 18 B. Giese and D. McNaughton, *J. Phys. Chem. B*, 2002, **106**, 101–112.
- 19 C. Canuel, M. Mons, F. Piuzzi, B. Tardivel, I. Dimicoli and M. Elhanine, *J. Chem. Phys.*, 2005, **122**, 74316.

20 M. Majoube, *J. Mol. Struct.*, 1986, **143**, 427–430.
